# Supplementary material for: Facile access to versatile N-vinylimidazole-based artificial tongue-like polymer gels
Source: Royal Society of Chemistry journal article supplement (doi:10.1039/c2sm27406j), 2013-01-01
Supplement: c2sm27406j.pdf [file c2sm27406j.pdf]

## Electronic Supplementary Information for

### Facile Access to Versatile *N*-vinylimidazole-Based Artificial Tongue-Like Polymer Gels

Zhi-Hong Zhang, Xiao-Feng Shi, Xin Guo, Cai-Feng Wang, and Su Chen\*

State Key Laboratory of Materials-Oriented Chemical Engineering, College of Chemistry and Chemical Engineering, Nanjing University of Technology, Nanjing 210009, P. R. China.

\*To whom correspondence should be addressed. E-mail: [chensu@njut.edu.cn](mailto:chensu@njut.edu.cn)

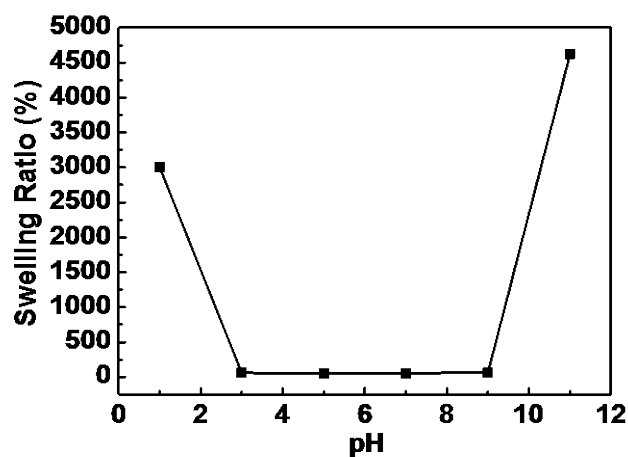

**Fig. S1** Equilibrium swelling ratios of the G-1 polymer gels as a function of the pH values of the medium adjusted by HCl or NaOH aqueous solution.

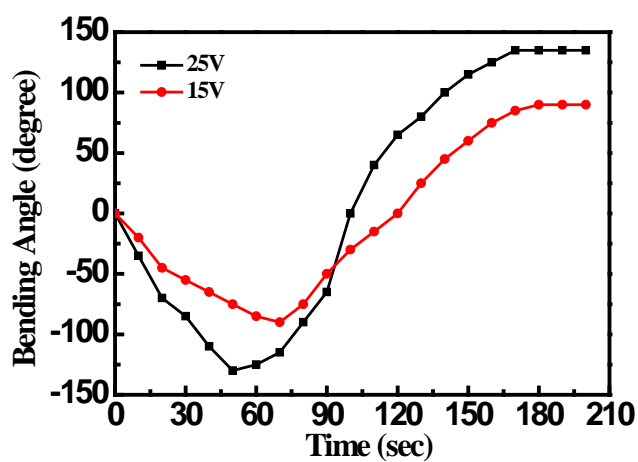

**Fig. S2** Temporal evolution of bending angle of the G-1 polymer gels in SC aqueous solutions of 0.8 M under 15 and 25 V, respectively.
